# Supplementary material for: Tumor-derived biomarkers predict efficacy of B7H3 antibody-drug conjugate treatment in metastatic prostate cancer models
Source: JCI journal article supplement (doi:10.1172/jci162148), 2023-09-19
Supplement: sd1 [file 1]

1 **List of Supplementary Materials**

2 **Materials and Methods**

3       Details of anti-B7H3 ADC generation

4       Simple Western protein quantification details

5       IF staining

6       Immunohistochemistry

7       CRISPR/Cas9 dropout screen

8       Gene signature scores

9 Figure S1. CD276/B7H3 expression in mPC patient samples, PDXs, and organoids.

10 Figure S2. B7H3 FACS analysis and correlation of B7H3 expression and AR score.

11 Figure S3. B7H3-PBD response in organoid models and B7H3 knockout assays.

12 Figure S4. Biomarker analysis of B7H3-PBD response.

13 Figure S5. Assay for ATR activity in selected organoids following treatment with  
14 chemotherapeutics.

15 Figure S6. In vitro and in vivo safety profile of the B7H3-PBD-ADC.

16 Figure S7. Analysis of SU2C clinical data to predict likely responders based on identified  
17 biomarkers of B7H3-PBD-ADC sensitivity.

18 Table S1. List of antibodies.

19 Data file S1. Descriptive data for B7H3-PBD response in 26 organoid models.

20 Data file S2. Differentially expressed genes between responder and Non-responder ARPC  
21 models.

22 References (34-38) only cited in the supplementary materials.

23

24

25 **Supplementary methods**

26

27 **Details of anti-B7H3 ADC generation**

28       B7H3 antibodies were isolated from naive human phage display libraries using phage display

29 soluble selections, performed according to standard methods (34). Three rounds of selection

30 were performed against recombinant human B7H3 4Ig\_avitag\_10His protein, immobilised on

31 wells of a MaxiSorp<sup>®</sup> microtitre plate (Nunc) overnight at 4°C. Round 2 and round 3 selection

32 outputs were evaluated for diversity, sequence uniques, and specificity, using phage ELISA to  
33 assess binding specificity across biotinylated human and cyno B7H3 fusion proteins.

34 Forty-four sequence-diverse clones with robust B7H3 binding were selected from round 2  
35 outputs, which had the highest sequence diversity. His-purified single chain variable fragments  
36 (scFv) were then screened for binding to a range of B7H3-expressing tumor cell lines. From  
37 these binding data, 20 were prioritized for conversion to HuIgG1 and site-specific cysteine  
38 conjugation to a PBD payload at DAR2, with subsequent screening for in vitro ADC cytotoxicity  
39 activity across 20 tumor cell lines.

40 Two molecules with the best cytotoxicity profile were chosen for affinity maturation, again  
41 using phage display soluble selections and targeted CDR3 mutagenesis. ScFv fragments were  
42 screened for improvements in Hu 4Ig biochemical binding, with sequence uniques profiled on  
43 4Ig, 2Ig and species variants of B7H3 protein. Subsequent conversion to HuIgG1 was followed  
44 by further protein & cell binding studies, with conjugation and cytotoxicity for the most  
45 promising molecules.

#### 46 **Simple Western protein quantification details**

47 Simple Western analysis was performed on Peggy Sue instrument according to the  
48 ProteinSimple user manual. Cell lysates adjusted to contain the same amount of protein were  
49 mixed with sodium dodecyl sulfate master mix (containing dithiothreitol (DTT) and fluorescent  
50 molecular weight markers, ProteinSimple), and were heated at 70°C for 10 min before loading to  
51 the instrument for fully automated analysis. Proteins (40 ng loaded) were separated based on  
52 molecular weight while migrating through the separation matrix; the separated proteins were  
53 immobilized to the capillary wall using UV light, and incubated with blocking reagent  
54 (ProteinSimple), followed by immunoprobng with respective primary antibodies (CD276 1:50

55 (AF1027, R&D) and GAPDH 1:100 (MAB374, Millipore) and HRP-conjugated anti-goat  
56 (1:100) or anti-mouse (1:600) secondary antibodies (Jackson ImmunoResearch). A 1:1 mixture  
57 of luminol and peroxide (ProteinSimple) was added to generate chemiluminescence, which was  
58 captured by CCD camera. The digital image was analyzed by Compass software (vs. 5.0.1;  
59 ProteinSimple). Target protein quantities were determined by calculating the area under the peak  
60 identified as CD276 (B7H3) and GAPDH, a housekeeping protein used as loading control.

### 61 **IF staining**

62 Organoids were dissociated and plated in 200 ul culture media (+/- doxycycline) with 2%  
63 Matrigel on poly-d-lysine coated chamber slides (Ibidi, 81201). After 24 hours, cells were fixed  
64 in 4% paraformaldehyde for 10 mins and stained with RB1 antibody and DAPI. Images were  
65 taken with Zeiss Axioscan.Z1 slide scanner.

### 66 67 **Immunohistochemistry**

68 For tissue microarray (TMA) slides automated IHC was performed on the VENTANA  
69 Discovery Ultra (Ventana Medical Systems Inc) autostainer. Onboard deparaffinization was  
70 conducted in DISCOVERY Wash buffer (VMSI, 950-510). Subsequent heat-induced epitope  
71 retrieval (HIER) was performed in DISCOVERY CC1 solution (VMSI, 950-500). Tissue  
72 microarray sections were incubated with B7H3 recombinant rabbit monoclonal antibody (Sigma  
73 Aldrich, SP206) at a dilution of 1:500 in Ventana Antibody Diluent with Casein (VMSI, 760-  
74 219). The primary antibody was bound with DISCOVERY anti-Rabbit HQ secondary antibody  
75 (Ventana), followed by DISCOVERY Anti-HQ HRP (VMSI, 760-4820) enzyme conjugate. The  
76 antibody complex was visualized using the ChromoMap DAB detection Kit (VMSI, Cat# 760-  
77 159). Hematoxylin II (VMSI, 790-2208) and Bluing Reagent (VMSI, 760-2037) were used to  
78 counterstain the sections.

79 **CRISPR/Cas9 dropout screen**

80 For the mini CRISPR/Cas9 dropout screen, Cas9 expressing organoids were dissociated and  
81 transduced with a custom lentiviral library of 16 sgRNAs which included two sgRNAs targeting  
82 B7H3 (sgB7H3 #1; CAACCGCACGGCCCTCTTCCCGG, sgB7H3 #2;  
83 CTCAGGGTAGCCCCGGTAGCTGG) along with one positive control sgRNA (U2AF1;  
84 GTCATGGAGACAGGTGCTCT) and two non-targeting control sgRNAs  
85 (ACTGCTCCCGGTGCGCCCTC , CGCACGACCATTGCTGCTGC). Transduction was done  
86 at a low MOI of 0.3-0.5 to maximize the likelihood of integrating one sgRNA per cell.  
87 Transduced cells were plated in 3D in 5% Matrigel on ultra-low attachment plates (Corning).  
88 After 24 hours, organoids were selected with 1ug/ml puromycin for 3 days.

89 Organoids were then passaged, and cell pellets were collected at the indicated time points up  
90 to 22 days. Day 0 indicates the first time point after puromycin selection. A small library of 16  
91 sgRNAs allowed >10,000x library coverage, with 200,000 cells pelleted at each time point for  
92 harvesting gDNA. All experiments were done in duplicate.

93 gDNA extraction and subsequent PCR amplification and purification of the sgRNA bar-  
94 coded regions were done according to the BROAD's protocol  
95 (<https://portals.broadinstitute.org/gpp/public/resources/protocols>). PCR libraries were sequenced  
96 on an Illumina MiSeq 2x150 bp (Genewiz). The sequencing data was analyzed using the  
97 MAGeCK package. Fold change of sgRNA read counts was calculated between the samples and  
98 the baseline Day 0 samples. The results shown are for two B7H3 sgRNAs in comparison with  
99 the positive control sgRNA and two negative control sgRNAs.

100 **Gene signature scores**

101 **(A) IFN signature score**

102 Normalized  $\log_2$ CPM gene expression values were converted to modified Z score (ZMAD)  
103 to achieve normal distribution. We then evaluated the expression of 49 interferon (IFN) genes  
104 from the previously published IFN-related DNA damage resistance signature (IRDS) for breast  
105 cancer (35). As a first pass for deriving a prostate specific IFN signature, we focused on genes  
106 that were detected in all LuCaP samples and calculated the IFN score. Next, we evaluated  
107 whether any of the other interferon genes, excluded in breast cancer signature, are correlated  
108 with IFN score in our cohort. In this case, we selected IFN genes that had adjusted p value  $\leq$   
109 0.05, a correlation coefficient greater than 0.5, and were a member of the Hallmark IFN alpha or  
110 Hallmark IFN gamma gene signature. A list of significantly correlated genes was defined as  
111 prostate cancer specific IFN signature and prostate specific IFN score was calculated. We further  
112 refined the IFN signature by again performing correlation analysis with prostate specific IFN  
113 score, but this time, using all genes. Additionally, we tightened our filtering criteria by using  
114 adjusted p value  $\leq$  0.05 and lower bound of the confidence interval  $>$  0.5 for filtering as opposed  
115 to the correlation coefficient. This resulted in 47 gene signature which was used to calculate the  
116 refined IFN score referred as “IFN Score” in the text and figures.

## 117 **(B) Replication stress score**

118 Replication stress signature score was generated using methodology previously described  
119 (36). Briefly, we selected Reactome gene sets for signatures related to DNA repair, replication,  
120 and cell cycle to define biological processes indicative of replication stress response. Initially,  
121 organoid RNAseq data was filtered by genes involved in the above selected pathways. Weights  
122 for the genes were generated by implementing principal component analysis across all models  
123 and derived from the first principal component. These weights were then applied across all

124 models via a dot product and summated to create replication stress (RepStress) scores for each  
125 model.

### 126 **(C) AR score and RB score**

127 AR score was calculated as described previously (37). RB.CRPC genes from McNair et al  
128 (38) were used as a gene set to calculate RB signature score using the GSVA function with  
129 default parameters from the GSVA R package (33).

130

### 131 **Supplementary references**

132

133 34. Vaughan TJ, et al. Human Antibodies with Sub-nanomolar Affinities Isolated from a Large  
134 Non-immunized Phage Display Library. *Nat Biotechnol.* 1996;14(3):309–314.

135 35. Weichselbaum RR, et al. An interferon-related gene signature for DNA damage resistance is  
136 a predictive marker for chemotherapy and radiation for breast cancer. *Proc Natl Acad Sci U S A.*  
137 2008;105(47):18490–18495.

138 36. Dreyer SB, et al. Targeting DNA Damage Response and Replication Stress in Pancreatic  
139 Cancer. *Gastroenterology.* 2021;160(1):362-377.e13.

140 37. Febbo PG, et al. Genomic strategy for targeting therapy in castration-resistant prostate  
141 cancer. *Journal of Clinical Oncology.* 2009;27(12):2022–2029.

142 38. McNair C, et al. Differential impact of RB status on E2F1 reprogramming in human cancer.  
143 *Journal of Clinical Investigation.* 2018;128(1):341–358.

144

### 145 **Supplementary figures**

146



148 **Figure S1. CD276/B7H3 expression in mPC patient samples, PDXs, and organoids. (Related**  
149 **to Figure 1).** (A) Molecular profile of organoid models tested in this study based on AR-,  
150 DNPC-, and neuroendocrine (NE) associated genes. *CD276/B7H3* and *FOLH1/PSMA* transcript  
151 levels are shown as Log<sub>2</sub>CPM. ARPC = AR-active adenocarcinoma (Intact and experimentally  
152 castrate resistant), Non-ARPC = SCNPC (LuCaPs 49, 93, 145.1, 145.2, 173.1) and AR<sup>NEG/LOW</sup>  
153 NE<sup>NEG</sup> (LuCaPs 173.2 and 176, respectively, grouped as DNPC) (2) phenotypes. Transcript data  
154 not available for 23.1CR and 77CR organoids. (B) Dot plot for B7H3 RNA expression in mPC  
155 organoids based on phenotypes. The red line indicates median B7H3 expression.  $P < 0.05$ ;  
156 significant, Wilcoxon test. (C) Intra-individual inter-tumor variation in CD276/B7H3 expression  
157 in patients with metastatic prostate cancer. *CD276/B7H3* transcript abundance determined by  
158 RNA sequencing analysis of metastatic prostate tumors. Transcript levels are shown as Log<sub>2</sub>  
159 FPKM. Boxplots include patients with at least two tumors profiled (149 tumors from 62 patients)  
160 and are ordered by per-patient median log<sub>2</sub> FPKM gene expression. (D) Distribution of B7H3  
161 protein expression in metastatic tumors from different sites. Dashed line shows H-score of 20.  
162 Solid line shows the mean H-score. (E) Western blot analysis of PDX samples (n=35), patient  
163 derived organoids (n =2, indicated by \*) and mouse prostate tumor (negative control). Similar  
164 B7H3 expression pattern is shown with two different B7H3 antibodies, Abcam (ab134161) and  
165 R&D (AF1027). GAPDH was used as a loading control. Oversaturated protein bands from long  
166 exposure are marked in red. CR = experimentally castrate resistant (F) Pearson correlation  
167 between B7H3 protein and RNA in the ARPC and non-ARPC models (ARPC models:  $r = 0.56$ ,  
168  $n = 18$ ,  $P = 0.015$ ; Non-ARPC models:  $r = 0.54$ ,  $n = 7$ ,  $P = 0.21$ ).

169



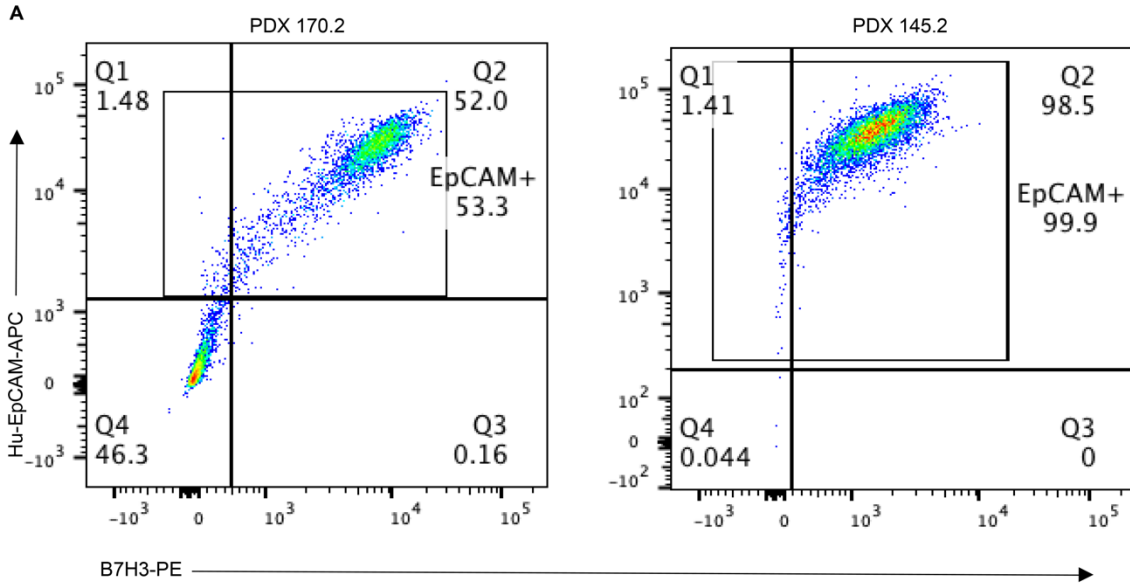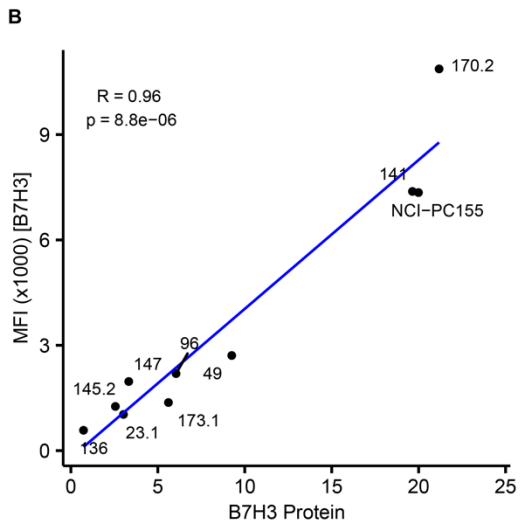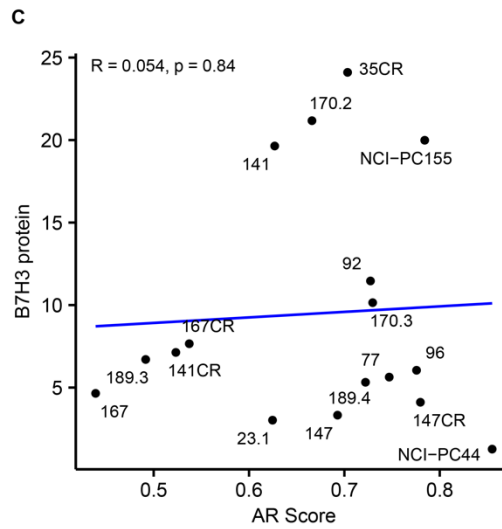

171 **Figure S2. B7H3 FACS analysis and correlation of B7H3 expression and AR score (related**  
172 **to Figure 2).** (A) Representative figures showing FACS gating strategy for EpCAM+/ B7H3+  
173 cell population in two organoid models, PDX 170.2 ARPC (left) and PDX 145.2 non-ARPC  
174 (right). (B) Scatter plot for Pearson correlation between B7H3 cell surface expression by flow  
175 cytometry (MFI) and total protein expression by Simple Western. (C) Plot of AR score and  
176 B7H3 protein for PDX models.  $P = 0.84$ , not significant.  
177

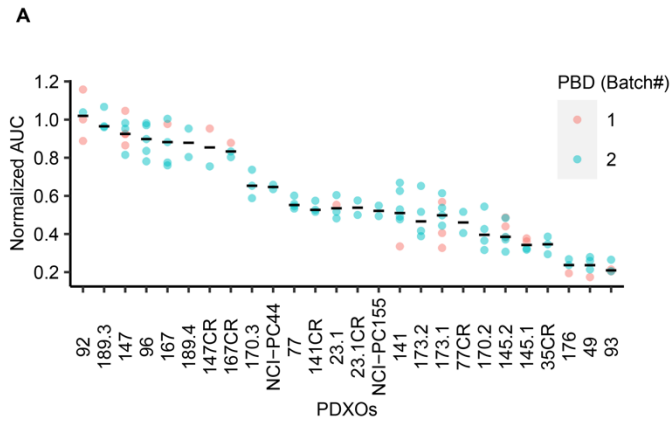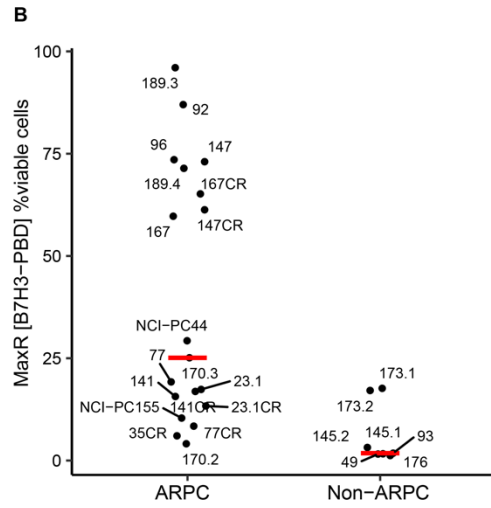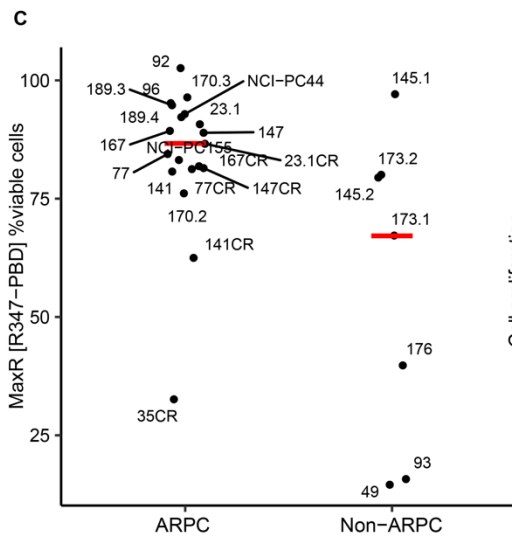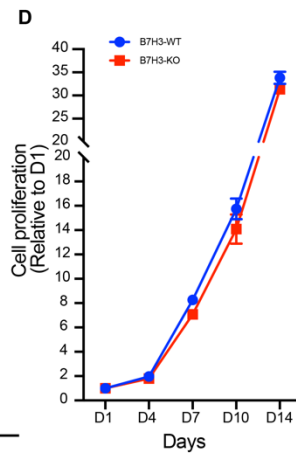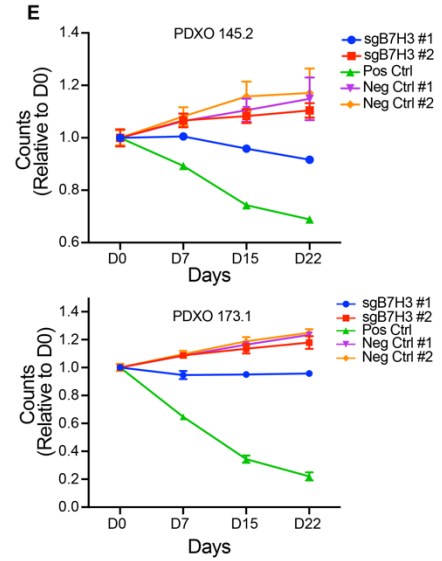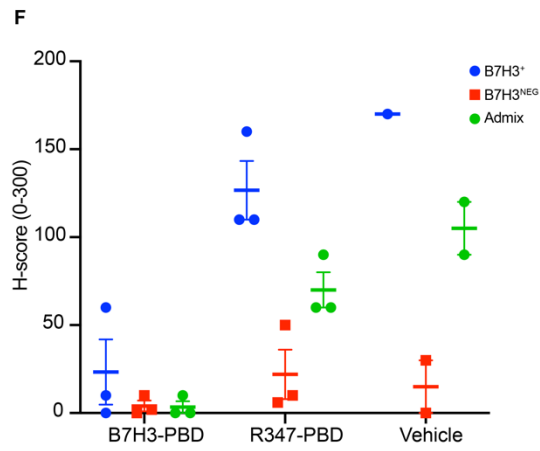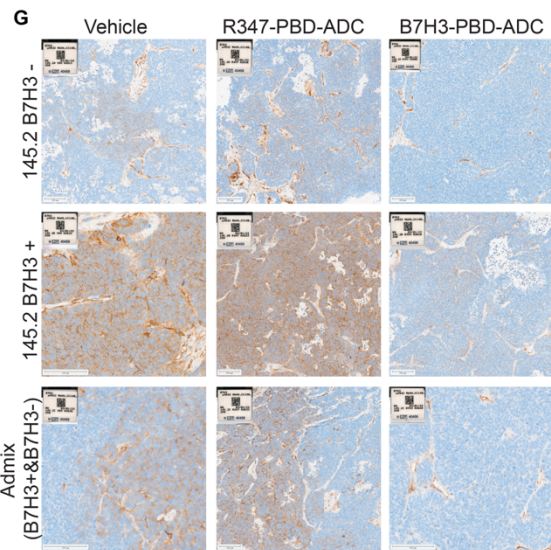

179 **Figure S3. B7H3-PBD response in organoid models and B7H3 knockout assays (related to**  
180 **Figure 3).** (A) Normalized AUC for each organoid model is plotted. Dots indicate number of  
181 independent biological replicates tested for each model with the two different batches of ADC  
182 (Batch #1 and #2). (B-C) For each organoid model, median value of biological replicates is  
183 plotted to show maximum response (MaxR) at 4 ug/ml dose of (B) B7H3-PBD-ADC and (C)  
184 R347-PBD-ADC . MaxR is shown as % viable cells left at the tested maximum concentration of  
185 4ug/ml. (D) Growth comparison of B7H3-WT(B7H3<sup>+</sup>) and B7H3-KO(B7H3<sup>NEG</sup>) LuCaP 145.2  
186 organoids at indicated time points by 3D CellTiter Glo; n =5 replicates for each. Error bars  
187 indicate the SEM. (E) CRISPR dropout screen in LuCaP 145.2 and LuCaP 173.1 organoids.  
188 Depletion of two B7H3 guides (sgB7H3 #1, sgB7H3 #2), two negative control guides, and a  
189 positive control single-guide RNA is shown at indicated time points relative to day 0 (D0).(F-G)  
190 Immunohistochemical assessments of B7H3 protein expression in xenografts from sorted  
191 B7H3<sup>+</sup>, B7H3<sup>NEG</sup>, and admix (mix of B7H3<sup>+</sup> and B7H3<sup>NEG</sup>) LuCaP 145.2 cells treated with  
192 vehicle, B7H3-PBD-ADC or R347-PBD-ADC. All tumors were collected when mice in vehicle  
193 cohort reached endpoint. n=3 per group, except vehicle treated group (B7H3<sup>+</sup>, n=1; B7H3<sup>NEG</sup>, n  
194 =2; admix, n=2) (F) Dot plot shows H-score. Solid line shows the mean H-score. (G)  
195 Representative IHC images are shown.

196

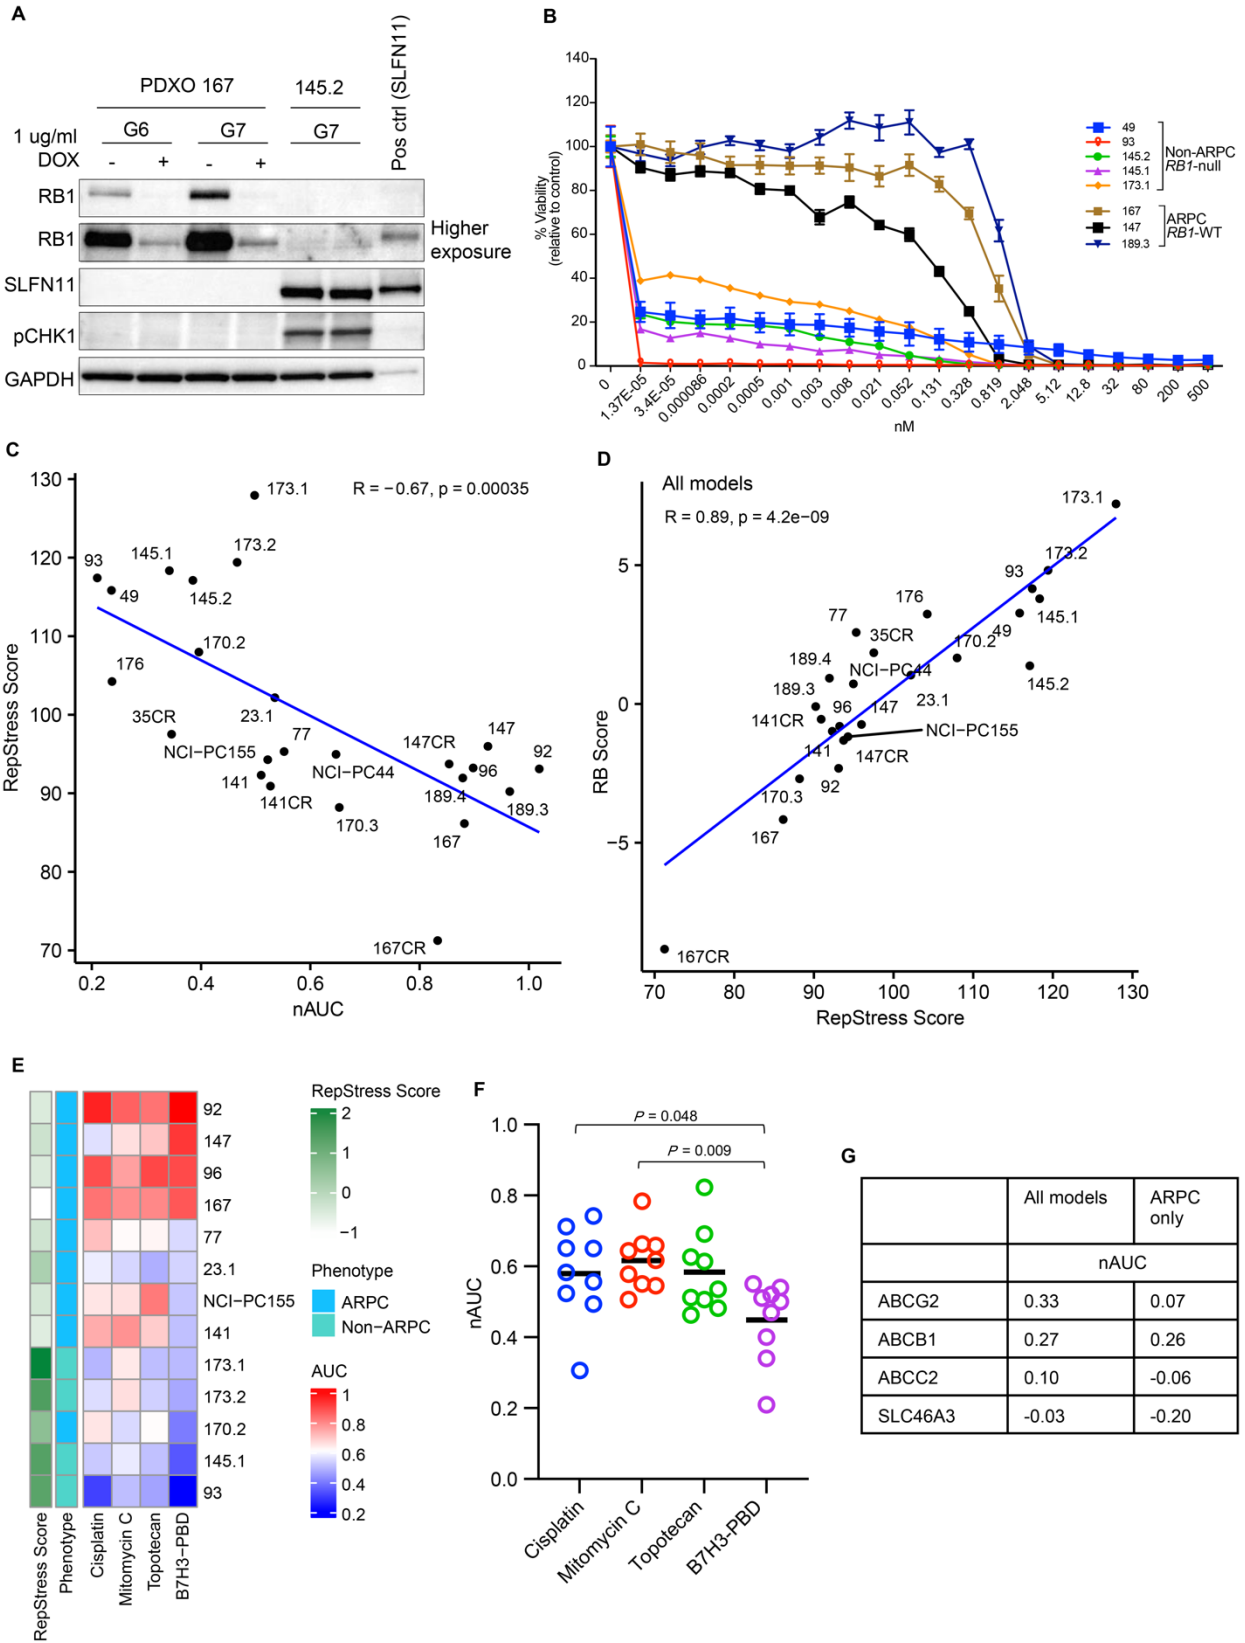

198 **Figure S4. Biomarker analysis of B7H3-PBD-ADC response. (Related to Figure 4 and 5)**  
199 **(A)** Immunoblot confirming RB1 knockdown with doxycycline inducible shRNA in PDX 167  
200 organoid model. PDX 145.2 organoids (RB1<sup>loss</sup>) is used as a RB1 negative control. Effect on  
201 SLFN11 and pCHK1 (Ser345) expression is also shown. SLFN11 positive control lysate is from  
202 293T cells transfected with SLFN11 expression vector. GAPDH is used as a loading control. **(B)**  
203 Dose response curve for free PBD dimer comparing sensitivity of RB1-wt and RB1-null models.  
204 **(C)** Plot comparing B7H3-PBD-ADC nAUC and RepStress score. Pearson's correlation  
205 coefficient  $r = -0.67$ ,  $P = 0.00035$ . **(D)** Pearson correlation between RB1 score and RepStress  
206 score across all models.  $r = 0.89$ ,  $P = 4.2e-09$ . **(E-F)** Heatmap **(E)** and dot plot **(F)** of normalized  
207 AUC (nAUC) values for organoid models in response to drugs targeting replication stress;  
208 B7H3-PBD, topotecan, cisplatin, and mitomycin C. Black line in the dot plot **(F)** indicates mean  
209 nAUC value.  $P < 0.05$ ; significant, Wilcoxon test. **(G)** Pearson's correlation analyses between  
210 RNA levels of previously identified biomarkers and PBD sensitivity.  $r$  values are shown.  $P =$  not  
211 significant.

212

213

214

215

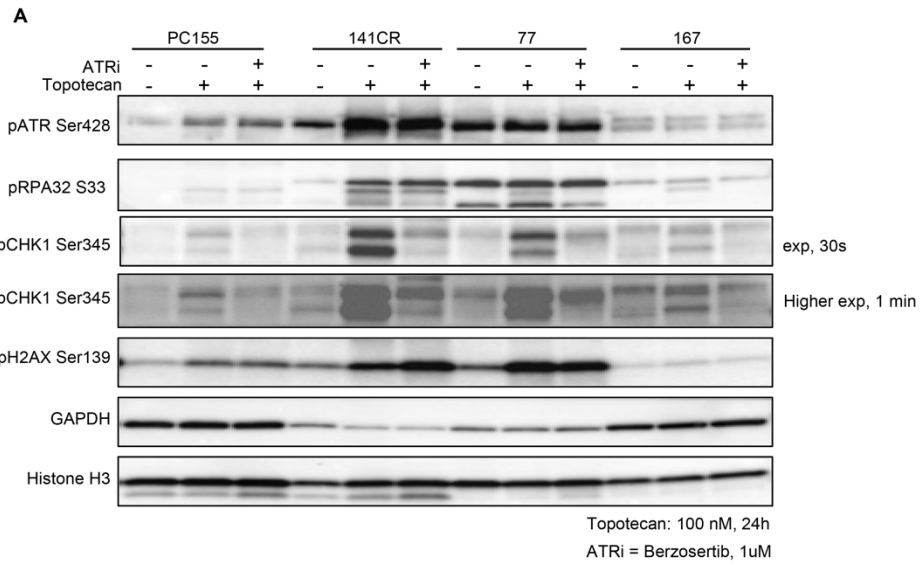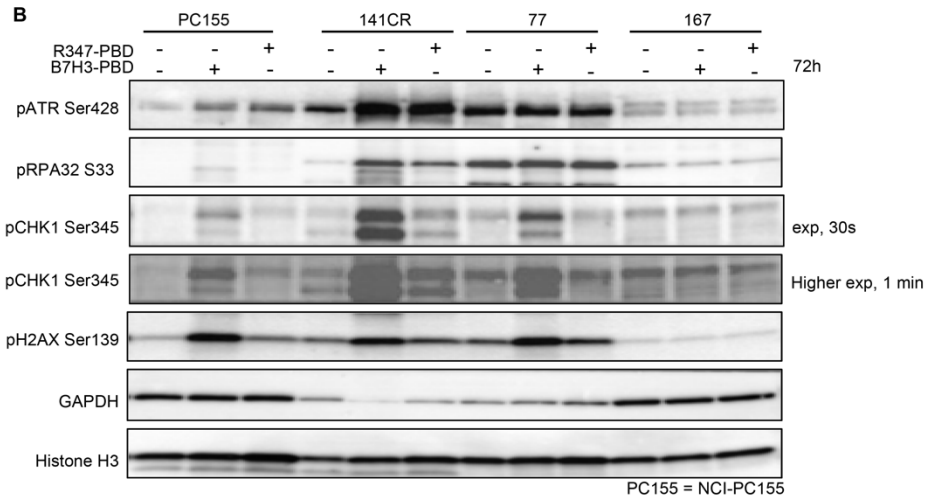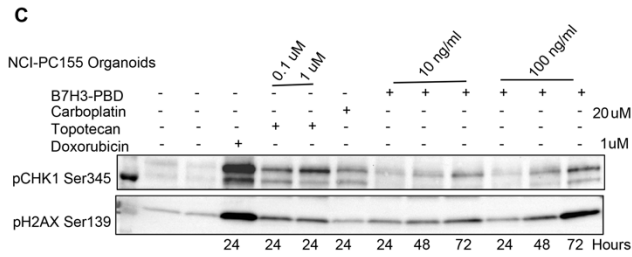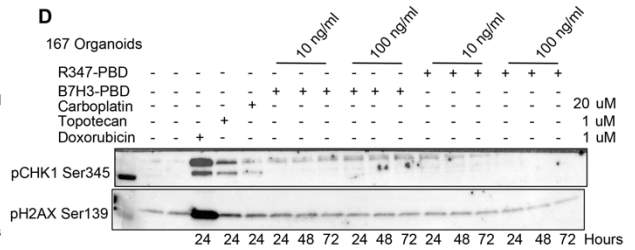

217 **Figure S5. Assay for ATR activity in selected organoids following treatment with**  
218 **chemotherapeutics. A and B:** ATR activity was measured by assessing pATR-Ser<sup>428</sup>, pRPA32-  
219 S<sup>33</sup> and pCHK1-Ser<sup>345</sup> levels. DNA damage in response to the treatment was measured by  
220 pH2AX Ser<sup>139</sup> levels. GAPDH and total histone H3 were used as loading controls. **(A)** Organoids  
221 were treated with topotecan (100 nM) for 24 hours in the presence or absence of ATR<sub>i</sub>  
222 (Berzosertib). **(B)** Organoids were treated with B7H3-PBD-ADC or R347-PBD-ADC for 72  
223 hours. **(C-D)** Expression of pCHK1-Ser<sup>345</sup> and pH2AX Ser<sup>139</sup> in (C) NCI-PC155 organoid model  
224 and (D) 167 organoid model in response to treatment with B7H3-PBD-ADC, R347-PBD-ADC,  
225 carboplatin, topotecan, and doxorubicin. Concentration and length of treatment is indicated for  
226 each drug.

227

228

229



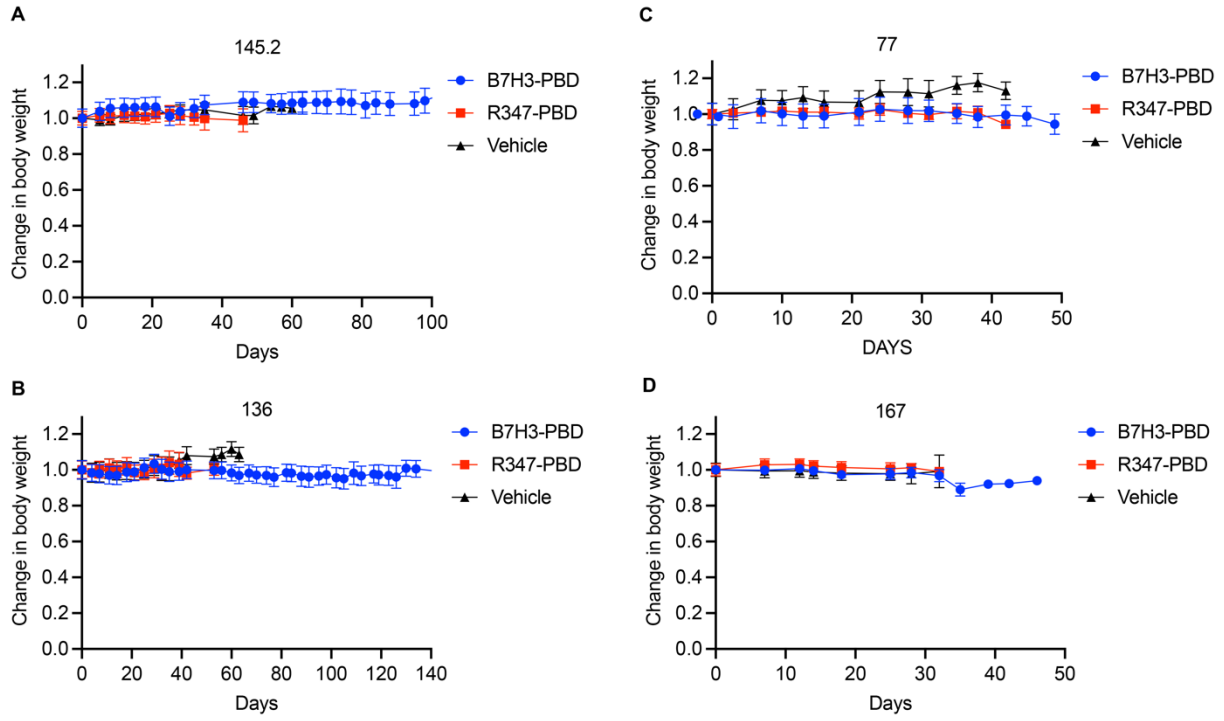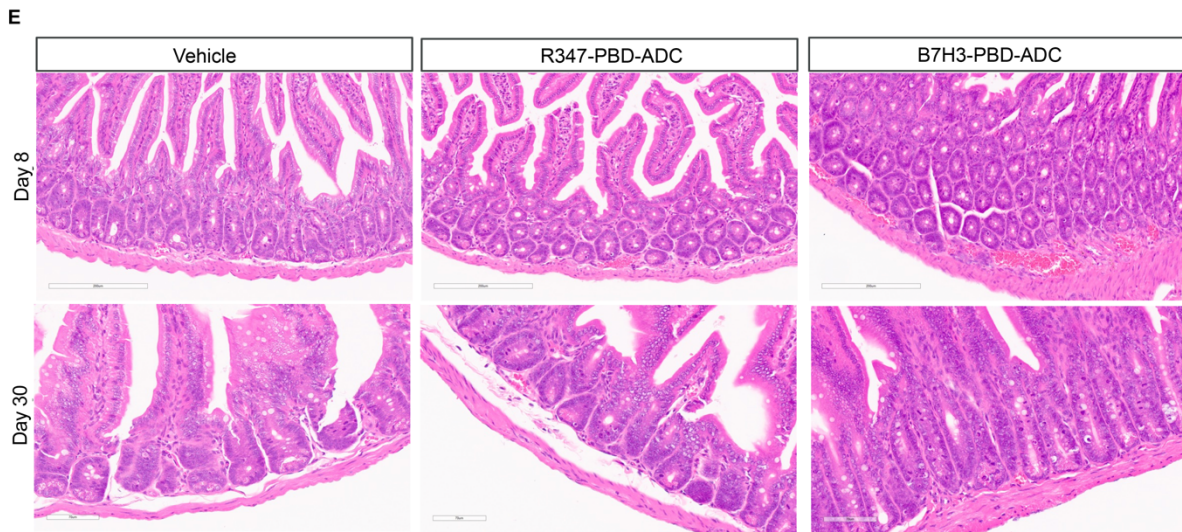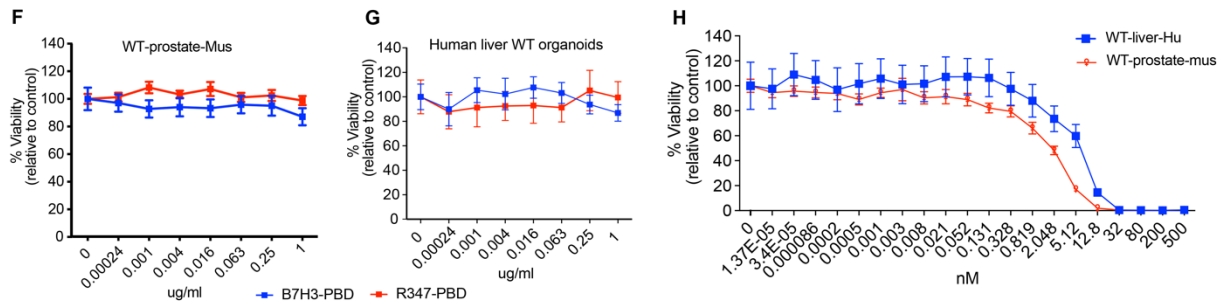

231 **Figure S6. In vitro and In vivo safety profile of ADC. (A-D)** Body weight for mice treated  
232 with B7H3-PBD-ADC, R347-PBD-ADC or vehicle (Related to figure 5). **(E)** H&E sections of  
233 small intestine collected on day 8 and day 30 post-treatment. **(F-H)** in vitro toxicity analysis of  
234 B7H3-PBD-ADC, R347-PBD-ADC, and free PBD dimer. **(F)** Normal human liver organoids  
235 and **(G)** wild type mouse prostate organoids were treated with the ADC for 10 days. Dose  
236 response curves are shown. **(H)** Dose response curve for free PBD dimer in normal human liver  
237 and normal mouse prostate organoids.

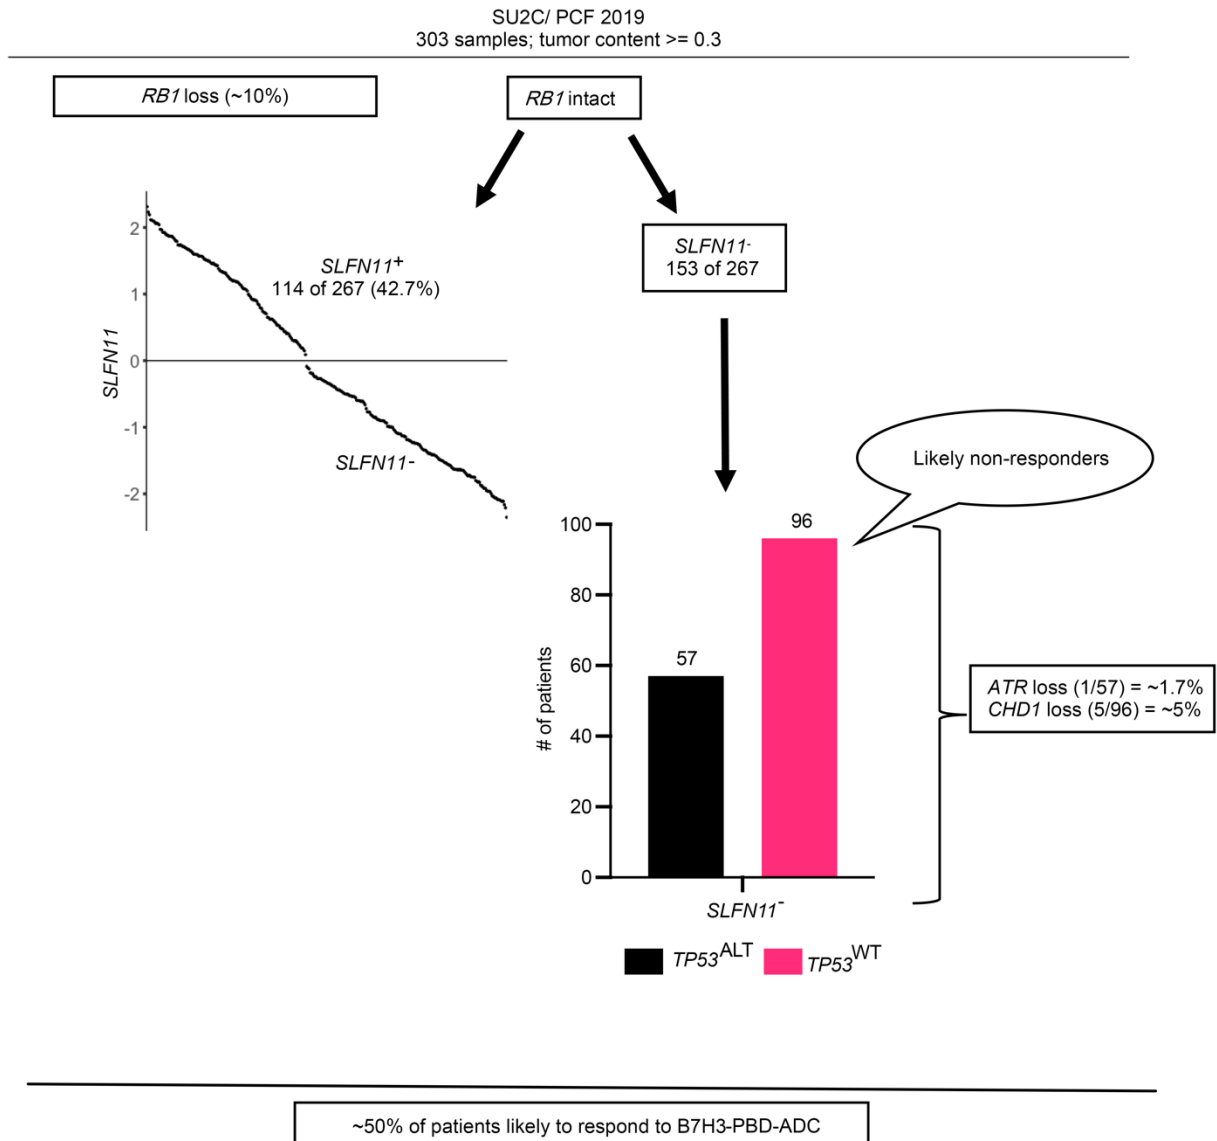

238

239 **Figure S7. (A)** Analysis of SU2C clinical data to predict likely responders based on identified

240 biomarkers of B7H3-PBD-ADC sensitivity (**Related to figure 4H**).  $\text{Log}_2(\text{FPKM}+1)$  mean

241 centered values are plotted for *SLFN11* expression after ordered quantile normalization.

242 Distribution of *SLFN11*<sup>-</sup> patients based on *TP53* genomic status is shown. *TP53*<sup>WT</sup> = at least one

243 WT allele and absence of gain of function mutation.

244

245 **Table S1. List of antibodies used.**

246

| <b>Target</b>  | <b>Company</b> | <b>Catalog number</b> | <b>Assay</b>             |
|----------------|----------------|-----------------------|--------------------------|
| AR             | Abcam          | ab133273              | Western                  |
| p53            | Cell Signaling | 48818                 | Western                  |
| PTEN           | Cell Signaling | 9188                  | Western                  |
| RB             | Cell Signaling | 9309                  | IF/Western               |
| B7H3           | Abcam          | ab134161              | Western                  |
| B7H3           | R&D            | AF1027                | Western / Simple Western |
| GAPDH          | Abcam          | ab8245                | Western                  |
| SLFN11         | Cell Signaling | 34858                 | Western                  |
| ATR            | Cell Signaling | 2790                  | Western                  |
| pCHK1 (Ser345) | Cell Signaling | 2348                  | Western                  |
| ATM            | Cell Signaling | 2873                  | Western                  |
| pH2AX (Ser129) | Cell Signaling | 9718                  | Western                  |
| p21            | Cell Signaling | 2947                  | Western                  |
| CHD1           | Cell Signaling | 4351                  | Western                  |
| KLK3           | Cell Signaling | 5365                  | Western                  |
| pATR (Ser428)  | Cell Signaling | 2853                  | Western                  |
| pRPA32 (S33)   | Bethyl labs    | A300-246A             | Western                  |
| Histone H3     | Cell Signaling | 4499                  | Western                  |
| CD276-PE       | Biolegend      | 331606                | FACS                     |
| EPCAM-APC      | Miltenyi       | 130-113-260           | FACS                     |

247

248

249

250

251
